# Supplementary material for: Using path analysis to test theory of change: a quantitative process evaluation of the MapSan trial
Source: Springer Nature journal article supplement (doi:10.1186/s12889-021-11364-w), 2021-07-16

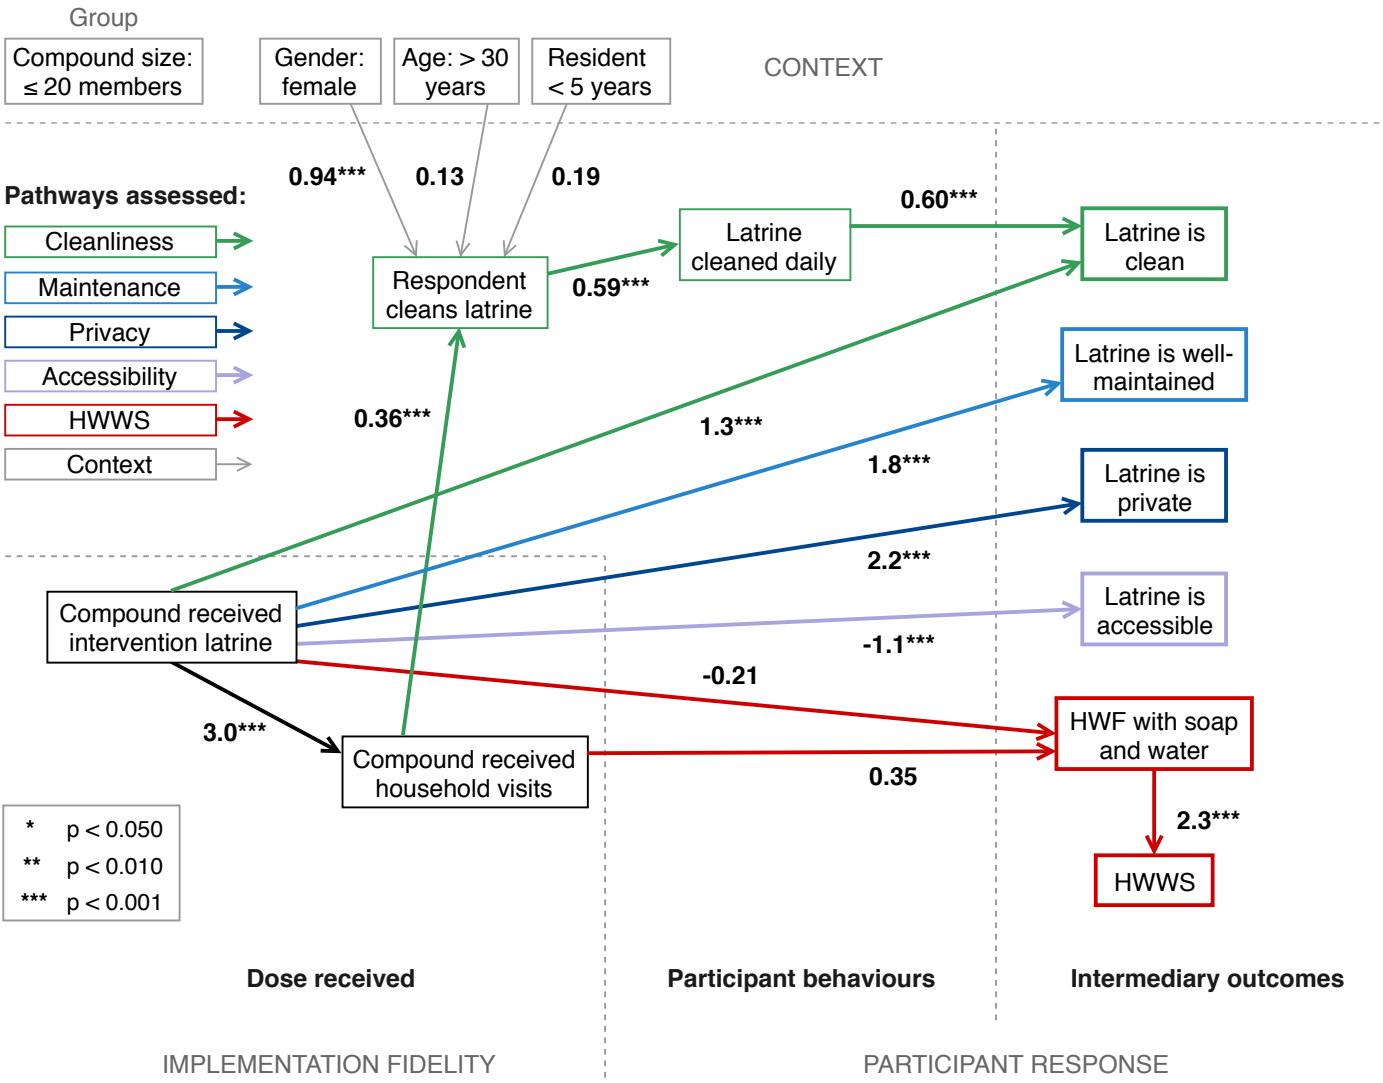

Supplement: MOESM4 [file 19368084]
